# Supplementary material for: Aesthetic Evaluation of Digitally Reproduced Art Images
Source: PubMed Central journal article supplement (PMC7759521; doi:10.3389/fpsyg.2020.615575), 2020-12-11
Supplement: Data_Sheet_1.pdf [file Data_Sheet_1.pdf]

## *Supplementary Material*

**Table A1:** List of all used artworks

| Artist           | Year | Title             | Museum            | Image Specifications                  | Information on saturation manipulation | Link                                                                                                                                                                                                                                                                                                                                                                                                                                                                                                                                                                                                                                                                                                                                                                          | Genre    |
|------------------|------|-------------------|-------------------|---------------------------------------|----------------------------------------|-------------------------------------------------------------------------------------------------------------------------------------------------------------------------------------------------------------------------------------------------------------------------------------------------------------------------------------------------------------------------------------------------------------------------------------------------------------------------------------------------------------------------------------------------------------------------------------------------------------------------------------------------------------------------------------------------------------------------------------------------------------------------------|----------|
| Camille Pissarro | 1900 | Bouquet de fleurs | Kunstmuseum Basel | Oil on silk on canvas<br>18 x 14.1 cm | +70%                                   | <a href="http://sammlungonline.kunstmuseumbasel.ch/eMuseumPlus?service=direct/1/ResultDetailView/result.inline.list.t1.collection_list.\$TsPTitleLink.link&amp;sp=13&amp;sp=Sartist&amp;sp=SfilterDefinition&amp;sp=0&amp;sp=27&amp;sp=1&amp;sp=SdetailView&amp;sp=39&amp;sp=Sdetail&amp;sp=0&amp;sp=T&amp;sp=0&amp;sp=SdetailList&amp;sp=0&amp;sp=F&amp;sp=Scollection&amp;sp=12066">http://sammlungonline.kunstmuseumbasel.ch/eMuseumPlus?service=direct/1/ResultDetailView/result.inline.list.t1.collection_list.\$TsPTitleLink.link&amp;sp=13&amp;sp=Sartist&amp;sp=SfilterDefinition&amp;sp=0&amp;sp=27&amp;sp=1&amp;sp=SdetailView&amp;sp=39&amp;sp=Sdetail&amp;sp=0&amp;sp=T&amp;sp=0&amp;sp=SdetailList&amp;sp=0&amp;sp=F&amp;sp=Scollection&amp;sp=12066</a>         | Stillife |
| Henri Matisse    | 1920 | Femme au divan    | Kunstmuseum Basel | Oil on canvas<br>60.2 x 73.4 cm       | +70%                                   | <a href="https://kmb.picturerepark.com/Go/4CVqeqEs">https://kmb.picturerepark.com/Go/4CVqeqEs</a>                                                                                                                                                                                                                                                                                                                                                                                                                                                                                                                                                                                                                                                                             | Figures  |
| Edouard Vallet   | 1912 | Autoportrait      | Kunstmuseum Basel | Oil on canvas<br>44 x 37 cm           | +60%                                   | <a href="http://sammlungonline.kunstmuseumbasel.ch/eMuseumPlus?service=direct/1/ResultDetailView/result.inline.list.t1.collection_list.\$TsPTitleImageLink.link&amp;sp=13&amp;sp=Sartist&amp;sp=SfilterDefinition&amp;sp=0&amp;sp=11&amp;sp=1&amp;sp=SdetailView&amp;sp=2&amp;sp=Sdetail&amp;sp=0&amp;sp=T&amp;sp=0&amp;sp=SdetailList&amp;sp=0&amp;sp=F&amp;sp=Scollection&amp;sp=11319">http://sammlungonline.kunstmuseumbasel.ch/eMuseumPlus?service=direct/1/ResultDetailView/result.inline.list.t1.collection_list.\$TsPTitleImageLink.link&amp;sp=13&amp;sp=Sartist&amp;sp=SfilterDefinition&amp;sp=0&amp;sp=11&amp;sp=1&amp;sp=SdetailView&amp;sp=2&amp;sp=Sdetail&amp;sp=0&amp;sp=T&amp;sp=0&amp;sp=SdetailList&amp;sp=0&amp;sp=F&amp;sp=Scollection&amp;sp=11319</a> | Portrait |

|                  |      |                                    |                   |                                 |      |                                                                                                                                                                                                                                                                                                                                                                                                                                                                                                                                                                                                                                                                                                                                                                               |            |
|------------------|------|------------------------------------|-------------------|---------------------------------|------|-------------------------------------------------------------------------------------------------------------------------------------------------------------------------------------------------------------------------------------------------------------------------------------------------------------------------------------------------------------------------------------------------------------------------------------------------------------------------------------------------------------------------------------------------------------------------------------------------------------------------------------------------------------------------------------------------------------------------------------------------------------------------------|------------|
| Ferdinand Hodler | 1904 | Bildnis Käthe von Bach (im Garten) | Kunstmuseum Basel | Oil on canvas<br>42.2 x 32.6 cm | +60% | <a href="http://sammlungonline.kunstmuseumbasel.ch/eMuseumPlus?service=direct/1/ResultDetailView/result.inline.list.t1.collection_list.\$TsPTitleLink.link&amp;sp=13&amp;sp=Sartist&amp;sp=SfilterDefinition&amp;sp=0&amp;sp=27&amp;sp=1&amp;sp=SdetailView&amp;sp=68&amp;sp=Sdetail&amp;sp=0&amp;sp=Top=0&amp;sp=SdetailList&amp;sp=0&amp;sp=Filter&amp;sp=Scollection&amp;sp=11190">http://sammlungonline.kunstmuseumbasel.ch/eMuseumPlus?service=direct/1/ResultDetailView/result.inline.list.t1.collection_list.\$TsPTitleLink.link&amp;sp=13&amp;sp=Sartist&amp;sp=SfilterDefinition&amp;sp=0&amp;sp=27&amp;sp=1&amp;sp=SdetailView&amp;sp=68&amp;sp=Sdetail&amp;sp=0&amp;sp=Top=0&amp;sp=SdetailList&amp;sp=0&amp;sp=Filter&amp;sp=Scollection&amp;sp=11190</a>         | Portrait   |
| Max Birrer       | 1934 | Oranges amères                     | Kunstmuseum Basel | Oil on canvas<br>46.5 x 61 cm   | +70% | <a href="http://sammlungonline.kunstmuseumbasel.ch/eMuseumPlus?service=direct/1/ResultDetailView/result.inline.list.t1.collection_list.\$TsPTitleImageLink.link&amp;sp=13&amp;sp=Sartist&amp;sp=SfilterDefinition&amp;sp=0&amp;sp=7&amp;sp=1&amp;sp=SdetailView&amp;sp=91&amp;sp=Sdetail&amp;sp=0&amp;sp=Top=0&amp;sp=SdetailList&amp;sp=0&amp;sp=Filter&amp;sp=Scollection&amp;sp=13155">http://sammlungonline.kunstmuseumbasel.ch/eMuseumPlus?service=direct/1/ResultDetailView/result.inline.list.t1.collection_list.\$TsPTitleImageLink.link&amp;sp=13&amp;sp=Sartist&amp;sp=SfilterDefinition&amp;sp=0&amp;sp=7&amp;sp=1&amp;sp=SdetailView&amp;sp=91&amp;sp=Sdetail&amp;sp=0&amp;sp=Top=0&amp;sp=SdetailList&amp;sp=0&amp;sp=Filter&amp;sp=Scollection&amp;sp=13155</a> | Stillife   |
| Edvard Munch     | 1918 | Küstenlandschaft                   | Kunstmuseum Basel | Oil on canvas<br>120.9 x 160 cm | +60% | <a href="http://sammlungonline.kunstmuseumbasel.ch/eMuseumPlus?service=direct/1/ResultDetailView/result.inline.list.t1.collection_list.\$TsPTitleImageLink.link&amp;sp=13&amp;sp=Sartist&amp;sp=SfilterDefinition&amp;sp=0&amp;sp=8&amp;sp=1">http://sammlungonline.kunstmuseumbasel.ch/eMuseumPlus?service=direct/1/ResultDetailView/result.inline.list.t1.collection_list.\$TsPTitleImageLink.link&amp;sp=13&amp;sp=Sartist&amp;sp=SfilterDefinition&amp;sp=0&amp;sp=8&amp;sp=1</a>                                                                                                                                                                                                                                                                                         | Land-scape |

|                   |               |                                |                   |                                 |      |                                                                                                                                                                                                                                                                                                                                                                                                                                                                                                                                                                                                                                                                                                                                                                     |          |
|-------------------|---------------|--------------------------------|-------------------|---------------------------------|------|---------------------------------------------------------------------------------------------------------------------------------------------------------------------------------------------------------------------------------------------------------------------------------------------------------------------------------------------------------------------------------------------------------------------------------------------------------------------------------------------------------------------------------------------------------------------------------------------------------------------------------------------------------------------------------------------------------------------------------------------------------------------|----------|
|                   |               |                                |                   |                                 |      | &sp=SdetailView&sp=234&sp=Sdetail&sp=0&sp=T&sp=0&sp=SdetailList&sp=0&sp=F&sp=Scollection&sp=11250                                                                                                                                                                                                                                                                                                                                                                                                                                                                                                                                                                                                                                                                   |          |
| Paul Gauguin      | 1892          | Ta matete (Le marché)          | Kunstmuseum Basel | Oil on jute<br>73.2 x 91.5 cm   | +70% | <a href="http://sammlungonline.kunstmuseumbasel.ch/eMuseumPlus?service=direct/1/ResultDetailView/result.inline.list.t1.collection_list.\$TsPTitleLink.link&amp;sp=13&amp;sp=Sartist&amp;sp=SfilterDefinition&amp;sp=0&amp;sp=10&amp;sp=1&amp;sp=SdetailView&amp;sp=7&amp;sp=Sdetail&amp;sp=0&amp;sp=T&amp;sp=0&amp;sp=SdetailList&amp;sp=0&amp;sp=F&amp;sp=Scollection&amp;sp=11162">http://sammlungonline.kunstmuseumbasel.ch/eMuseumPlus?service=direct/1/ResultDetailView/result.inline.list.t1.collection_list.\$TsPTitleLink.link&amp;sp=13&amp;sp=Sartist&amp;sp=SfilterDefinition&amp;sp=0&amp;sp=10&amp;sp=1&amp;sp=SdetailView&amp;sp=7&amp;sp=Sdetail&amp;sp=0&amp;sp=T&amp;sp=0&amp;sp=SdetailList&amp;sp=0&amp;sp=F&amp;sp=Scollection&amp;sp=11162</a> | Figures  |
| Paul Cézanne      | 1885/<br>1887 | Cinq baigneuses                | Kunstmuseum Basel | Oil on canvas<br>65.3 x 65.3 cm | +70% | <a href="http://sammlungonline.kunstmuseumbasel.ch/eMuseumPlus?service=direct/1/ResultDetailView/result.inline.list.t1.collection_list.\$TsPTitleLink.link&amp;sp=13&amp;sp=Sartist&amp;sp=SfilterDefinition&amp;sp=0&amp;sp=3&amp;sp=1&amp;sp=SdetailView&amp;sp=32&amp;sp=Sdetail&amp;sp=0&amp;sp=T&amp;sp=0&amp;sp=SdetailList&amp;sp=0&amp;sp=F&amp;sp=Scollection&amp;sp=11136">http://sammlungonline.kunstmuseumbasel.ch/eMuseumPlus?service=direct/1/ResultDetailView/result.inline.list.t1.collection_list.\$TsPTitleLink.link&amp;sp=13&amp;sp=Sartist&amp;sp=SfilterDefinition&amp;sp=0&amp;sp=3&amp;sp=1&amp;sp=SdetailView&amp;sp=32&amp;sp=Sdetail&amp;sp=0&amp;sp=T&amp;sp=0&amp;sp=SdetailList&amp;sp=0&amp;sp=F&amp;sp=Scollection&amp;sp=11136</a> | Figures  |
| Amedeo Modigliani | 1918          | Marie (Marie, fille du peuple) | Kunstmuseum Basel | Oil on canvas<br>61.2 x 49.8 cm | +60% | <a href="http://sammlungonline.kunstmuseumbasel.ch/eMuseumPlus?service=direct/1/ResultDetailView/result.inline.list.t1.c">http://sammlungonline.kunstmuseumbasel.ch/eMuseumPlus?service=direct/1/ResultDetailView/result.inline.list.t1.c</a>                                                                                                                                                                                                                                                                                                                                                                                                                                                                                                                       | Portrait |

|                        |      |                                                             |                                      |                                                                                                    |      |                                                                                                                                                                                                                         |                |
|------------------------|------|-------------------------------------------------------------|--------------------------------------|----------------------------------------------------------------------------------------------------|------|-------------------------------------------------------------------------------------------------------------------------------------------------------------------------------------------------------------------------|----------------|
|                        |      |                                                             |                                      |                                                                                                    |      | ollection_list.\$TitleLink.link&sp=13&sp=Sartist&sp=SfilterDefinition&sp=0&sp=21&sp=1&sp=SdetailView&sp=184&sp=Sdetail&sp=0&sp=T&sp=0&sp=SdetailList&sp=0&sp=F&sp=Scollection&sp=11244                                  |                |
| Vincent van Gogh       | 1889 | Vue de l'asile et de la Chapelle de Saint-Rémy              | Private Collection                   | Oil on Canvas<br>45.1 x 60.4 cm                                                                    | +70% | <a href="https://www.christies.com/lotfinder/Lot/vincent-van-gogh-1853-1890-vue-de-5532359-details.aspx">https://www.christies.com/lotfinder/Lot/vincent-van-gogh-1853-1890-vue-de-5532359-details.aspx</a>             | Land-<br>scape |
| Egon Schiele           | 1910 | Stadt am blauen Fluss ( <u>Krumau</u> )                     | Private Collection                   | Gouache,<br>watercolor,<br>metallic paint<br>and black<br>Conté crayon<br>on paper<br>45 x 31.4 cm | +50  | <a href="https://commons.wikimedia.org/wiki/File:Egon_Schiele_-_Stadt_am_blaue_n_Fluss_(1910).jpg">https://commons.wikimedia.org/wiki/File:Egon_Schiele_-_Stadt_am_blaue_n_Fluss_(1910).jpg</a>                         | Land-<br>scape |
| Claude Monet           | 1871 | La Tamise à Westminster                                     | National Gallery London              | Oil on canvas<br>47 x 73 cm                                                                        | +60% | <a href="https://www.nationalgallery.org.uk/paintings/claude-monet-the-thames-below-westminster">https://www.nationalgallery.org.uk/paintings/claude-monet-the-thames-below-westminster</a>                             | Land-<br>scape |
| Paula Modersohn-Becker | 1907 | Stilleben mit Ringelrosen und Bernsteinkette vor Landschaft | Private Collection                   | Oil on canvas<br>25.0 x 28.5 cm                                                                    | +50% | <a href="https://www.museen-boettcherstrasse.de/ausstellungen/paula-modersohn-becker-aus-privaten-sammlungen/">https://www.museen-boettcherstrasse.de/ausstellungen/paula-modersohn-becker-aus-privaten-sammlungen/</a> | Stillife       |
| Paul Cézanne           | 1877 | Nature morte avec pot, tasse et pommes                      | Metropolitan Museum of Art, New York | Oil on canvas<br>60.6 x 73.7 cm                                                                    | +80% | <a href="https://www.metmuseum.org/toah/works-of-art/29.100.66/">https://www.metmuseum.org/toah/works-of-art/29.100.66/</a>                                                                                             | Stillife       |
| Vincent van Gogh       | 1890 | La cour de la prison                                        | Pushkin Museum of Fine Arts, Moscow  | Oil on canvas<br>80 x 64 cm                                                                        | +60% | <a href="https://de.wikipedia.org/wiki/Dat ei:Vincent_Wille m_van_Gogh_037.jpg">https://de.wikipedia.org/wiki/Dat ei:Vincent_Wille m_van_Gogh_037.jpg</a>                                                               | Figures        |

|                                      |      |                            |                                |                                    |      |                                                                                                                                                   |          |
|--------------------------------------|------|----------------------------|--------------------------------|------------------------------------|------|---------------------------------------------------------------------------------------------------------------------------------------------------|----------|
| <a href="#">Alexej von Jawlensky</a> | 1913 | Grosser Frauenkopf auf Rot | Pinakothek der Moderne München | Oil on cardboard<br>68.8 x 49.9 cm | +60% | <a href="https://www.sammlung.pinakothek.de/de/bookmark/artwork/bwx0338Y4m">https://www.sammlung.pinakothek.de/de/bookmark/artwork/bwx0338Y4m</a> | Portrait |
|--------------------------------------|------|----------------------------|--------------------------------|------------------------------------|------|---------------------------------------------------------------------------------------------------------------------------------------------------|----------|

**Table A2:** Overall saturation and brightness of the used stimulus images

|                           | Saturation |             |          | Brightness |             |          |
|---------------------------|------------|-------------|----------|------------|-------------|----------|
|                           | original   | manipulated | increase | original   | manipulated | increase |
| Birrer "Oranges ameres"   | 41         | 96          | 133%     | 142        | 161         | 14%      |
| Cezanne "Baigneuses"      | 66         | 152         | 131%     | 139        | 173         | 24%      |
| Cezanne "Nature morte"    | 87         | 179         | 105%     | 106        | 136         | 28%      |
| Gaugin "Te matete"        | 106        | 184         | 74%      | 128        | 159         | 24%      |
| Hodler "Käthe"            | 66         | 131         | 99%      | 160        | 188         | 18%      |
| Jawlensky "Frauenkopf"    | 94         | 175         | 85%      | 95         | 123         | 29%      |
| Matisse "Femme au divan"  | 57         | 129         | 127%     | 161        | 192         | 19%      |
| Modersohn "Stilleben"     | 66         | 109         | 65%      | 137        | 153         | 11%      |
| Modigliani "Marie"        | 105        | 161         | 53%      | 102        | 122         | 20%      |
| Monet "Themse"            | 41         | 89          | 118%     | 168        | 188         | 12%      |
| Munch "Küstenlandschaft"  | 66         | 127         | 94%      | 120        | 141         | 17%      |
| Pissarro "Bouquet"        | 67         | 152         | 127%     | 108        | 137         | 26%      |
| Schiele "Stadt"           | 86         | 143         | 67%      | 125        | 147         | 18%      |
| Vallet "Autoportrait"     | 86         | 156         | 82%      | 123        | 148         | 20%      |
| Van Gogh "La cour"        | 38         | 82          | 113%     | 136        | 149         | 10%      |
| Van Gogh "Vue de l'asile" | 82         | 176         | 116%     | 143        | 185         | 29%      |
| Averages                  | 72         | 140         | 99%      | 131        | 156         | 20%      |

**Table A3:** Descriptive Statistics for all used images

Set 1

| Paul Cézanne, Cinque baigneuses, 1885/1887 |          |             |               |           |            |            |                      |               |           |            |            |
|--------------------------------------------|----------|-------------|---------------|-----------|------------|------------|----------------------|---------------|-----------|------------|------------|
|                                            | Original |             |               |           |            |            | Augmented saturation |               |           |            |            |
|                                            | <i>n</i> | <i>Mean</i> | <i>Median</i> | <i>SD</i> | <i>Min</i> | <i>Max</i> | <i>Mean</i>          | <i>Median</i> | <i>SD</i> | <i>Min</i> | <i>Max</i> |
| 100ms                                      | 72       | 43.76       | 46            | 24.541    | 0          | 93         | 44.17                | 45            | 24.888    | 0          | 93         |
| Unrestricted time                          | 72       | 46.72       | 45            | 24.470    | 0          | 96         | 41.10                | 40            | 24.169    | 0          | 96         |

| Paul Gauguin, Te matate (le marché), 1892 |          |             |               |           |            |            |                      |               |           |            |            |
|-------------------------------------------|----------|-------------|---------------|-----------|------------|------------|----------------------|---------------|-----------|------------|------------|
|                                           | Original |             |               |           |            |            | Augmented saturation |               |           |            |            |
|                                           | <i>n</i> | <i>Mean</i> | <i>Median</i> | <i>SD</i> | <i>Min</i> | <i>Max</i> | <i>Mean</i>          | <i>Median</i> | <i>SD</i> | <i>Min</i> | <i>Max</i> |
| 100ms                                     | 72       | 42.56       | 42            | 24.310    | 0          | 95         | 44.26                | 40            | 24.470    | 0          | 95         |
| Unrestricted time                         | 72       | 53.46       | 55            | 22.259    | 11         | 100        | 52.54                | 55            | 23.855    | 0          | 90         |

| Amedeo Modigliani, Marie, 1918 |          |             |               |           |            |            |                      |               |           |            |            |
|--------------------------------|----------|-------------|---------------|-----------|------------|------------|----------------------|---------------|-----------|------------|------------|
|                                |          | Original    |               |           |            |            | Augmented saturation |               |           |            |            |
|                                | <i>n</i> | <i>Mean</i> | <i>Median</i> | <i>SD</i> | <i>Min</i> | <i>Max</i> | <i>Mean</i>          | <i>Median</i> | <i>SD</i> | <i>Min</i> | <i>Max</i> |
| 100ms                          | 72       | 49.49       | 49.50         | 27.740    | 4          | 100        | 47.79                | 41.50         | 27.587    | 4          | 100        |
| Unrestricted time              | 72       | 47.40       | 46            | 27.519    | 0          | 100        | 47.68                | 50            | 28.294    | 0          | 100        |

| Edouard Vallet, Autoportrait, 1912 |          |             |               |           |            |            |                      |               |           |            |            |
|------------------------------------|----------|-------------|---------------|-----------|------------|------------|----------------------|---------------|-----------|------------|------------|
|                                    |          | Original    |               |           |            |            | Augmented saturation |               |           |            |            |
|                                    | <i>n</i> | <i>Mean</i> | <i>Median</i> | <i>SD</i> | <i>Min</i> | <i>Max</i> | <i>Mean</i>          | <i>Median</i> | <i>SD</i> | <i>Min</i> | <i>Max</i> |
| 100ms                              | 72       | 39.85       | 38.50         | 25.943    | 0          | 86         | 38.57                | 35            | 25.323    | 0          | 85         |
| Unrestricted time                  | 72       | 40.08       | 40            | 24.338    | 0          | 100        | 41.14                | 40            | 24.359    | 0          | 100        |

| Claude Monet, La Tamise à Westminster, 1871 |          |             |               |           |            |            |                      |               |           |            |            |
|---------------------------------------------|----------|-------------|---------------|-----------|------------|------------|----------------------|---------------|-----------|------------|------------|
|                                             |          | Original    |               |           |            |            | Augmented saturation |               |           |            |            |
|                                             | <i>n</i> | <i>Mean</i> | <i>Median</i> | <i>SD</i> | <i>Min</i> | <i>Max</i> | <i>Mean</i>          | <i>Median</i> | <i>SD</i> | <i>Min</i> | <i>Max</i> |
| 100ms                                       | 72       | 59.79       | 62            | 23.214    | 0          | 95         | 59.82                | 65            | 25.789    | 0          | 98         |
| Unrestricted time                           | 72       | 59.75       | 66            | 23.558    | 0          | 96         | 65.83                | 71.50         | 24.508    | 0          | 100        |

| Edvard Munch, Küstenlandschaft, 1918 |          |             |               |           |            |            |                      |               |           |            |            |
|--------------------------------------|----------|-------------|---------------|-----------|------------|------------|----------------------|---------------|-----------|------------|------------|
|                                      |          | Original    |               |           |            |            | Augmented saturation |               |           |            |            |
|                                      | <i>n</i> | <i>Mean</i> | <i>Median</i> | <i>SD</i> | <i>Min</i> | <i>Max</i> | <i>Mean</i>          | <i>Median</i> | <i>SD</i> | <i>Min</i> | <i>Max</i> |
| 100ms                                | 72       | 48.21       | 49.50         | 26.146    | 0          | 100        | 50.33                | 53.50         | 25.031    | 0          | 100        |
| Unrestricted time                    | 72       | 56.10       | 59            | 24.252    | 0          | 100        | 58.03                | 60            | 25.548    | 0          | 100        |

| Camille Pissarro, Bouquet de fleurs, 1900 |          |             |               |           |            |            |                      |               |           |            |            |
|-------------------------------------------|----------|-------------|---------------|-----------|------------|------------|----------------------|---------------|-----------|------------|------------|
|                                           |          | Original    |               |           |            |            | Augmented saturation |               |           |            |            |
|                                           | <i>n</i> | <i>Mean</i> | <i>Median</i> | <i>SD</i> | <i>Min</i> | <i>Max</i> | <i>Mean</i>          | <i>Median</i> | <i>SD</i> | <i>Min</i> | <i>Max</i> |
| 100ms                                     | 72       | 40.13       | 43            | 22.457    | 0          | 100        | 44.21                | 46            | 25.682    | 0          | 100        |
| Unrestricted time                         | 72       | 40.96       | 43            | 25.891    | 0          | 95         | 47.38                | 48            | 23.753    | 0          | 89         |

| Max Birrer, Oranges amères, 1934 |          |             |               |           |            |            |                      |               |           |            |            |
|----------------------------------|----------|-------------|---------------|-----------|------------|------------|----------------------|---------------|-----------|------------|------------|
|                                  |          | Original    |               |           |            |            | Augmented saturation |               |           |            |            |
|                                  | <i>n</i> | <i>Mean</i> | <i>Median</i> | <i>SD</i> | <i>Min</i> | <i>Max</i> | <i>Mean</i>          | <i>Median</i> | <i>SD</i> | <i>Min</i> | <i>Max</i> |
| 100ms                            | 72       | 45.78       | 50            | 23.632    | 0          | 100        | 48.85                | 50            | 24.337    | 0          | 100        |
| Unrestricted time                | 72       | 48.25       | 50            | 24.218    | 0          | 100        | 54.18                | 58.50         | 24.823    | 5          | 90         |

Set 2

| Henri Matisse, Femme au divan, 1920 |          |             |               |           |            |            |                      |               |           |            |            |
|-------------------------------------|----------|-------------|---------------|-----------|------------|------------|----------------------|---------------|-----------|------------|------------|
|                                     |          | Original    |               |           |            |            | Augmented saturation |               |           |            |            |
|                                     | <i>n</i> | <i>Mean</i> | <i>Median</i> | <i>SD</i> | <i>Min</i> | <i>Max</i> | <i>Mean</i>          | <i>Median</i> | <i>SD</i> | <i>Min</i> | <i>Max</i> |
| 100ms                               | 75       | 43.76       | 46            | 24.541    | 0          | 93         | 44.17                | 45            | 24.888    | 0          | 93         |
| Unrestricted time                   | 75       | 46.72       | 45            | 24.470    | 0          | 96         | 41.10                | 40            | 24.169    | 0          | 96         |

| Vincent van Gogh, La cour de la prison, 1890 |          |             |               |           |            |            |                      |               |           |            |            |
|----------------------------------------------|----------|-------------|---------------|-----------|------------|------------|----------------------|---------------|-----------|------------|------------|
|                                              |          | Original    |               |           |            |            | Augmented saturation |               |           |            |            |
|                                              | <i>n</i> | <i>Mean</i> | <i>Median</i> | <i>SD</i> | <i>Min</i> | <i>Max</i> | <i>Mean</i>          | <i>Median</i> | <i>SD</i> | <i>Min</i> | <i>Max</i> |
| 100ms                                        | 75       | 49.05       | 51            | 21.843    | 0          | 91         | 48.33                | 49            | 20.958    | 0          | 90         |
| Unrestricted time                            | 75       | 57.43       | 60            | 23.982    | 0          | 100        | 60.19                | 60            | 24.543    | 0          | 100        |

| Ferdinand Hodler, Bildnis Käthe von Bach (im Garten), 1904 |          |             |               |           |            |            |                      |               |           |            |            |
|------------------------------------------------------------|----------|-------------|---------------|-----------|------------|------------|----------------------|---------------|-----------|------------|------------|
|                                                            |          | Original    |               |           |            |            | Augmented saturation |               |           |            |            |
|                                                            | <i>n</i> | <i>Mean</i> | <i>Median</i> | <i>SD</i> | <i>Min</i> | <i>Max</i> | <i>Mean</i>          | <i>Median</i> | <i>SD</i> | <i>Min</i> | <i>Max</i> |
| 100ms                                                      | 75       | 56.67       | 58            | 23.131    | 2          | 100        | 58.59                | 60            | 23.515    | 0          | 100        |
| Unrestricted time                                          | 75       | 58.91       | 65            | 27.296    | 4          | 100        | 59.33                | 65            | 24.843    | 0          | 100        |

| Alexej von Jawlensky, Grosser Frauenkopf auf Rot, 1913 |          |             |               |           |            |            |                      |               |           |            |            |
|--------------------------------------------------------|----------|-------------|---------------|-----------|------------|------------|----------------------|---------------|-----------|------------|------------|
|                                                        |          | Original    |               |           |            |            | Augmented saturation |               |           |            |            |
|                                                        | <i>n</i> | <i>Mean</i> | <i>Median</i> | <i>SD</i> | <i>Min</i> | <i>Max</i> | <i>Mean</i>          | <i>Median</i> | <i>SD</i> | <i>Min</i> | <i>Max</i> |
| 100ms                                                  | 75       | 49.85       | 52            | 25.083    | 0          | 100        | 49.96                | 48            | 25.252    | 0          | 100        |
| Unrestricted time                                      | 75       | 46.19       | 45            | 23.316    | 0          | 96         | 48.92                | 54            | 25.700    | 0          | 94         |

| Vincent van Gogh, Vue de l'asile et de la Chapelle de Saint-Rémy, 1889 |          |             |               |           |            |            |                      |               |           |            |            |
|------------------------------------------------------------------------|----------|-------------|---------------|-----------|------------|------------|----------------------|---------------|-----------|------------|------------|
|                                                                        |          | Original    |               |           |            |            | Augmented saturation |               |           |            |            |
|                                                                        | <i>n</i> | <i>Mean</i> | <i>Median</i> | <i>SD</i> | <i>Min</i> | <i>Max</i> | <i>Mean</i>          | <i>Median</i> | <i>SD</i> | <i>Min</i> | <i>Max</i> |
| 100ms                                                                  | 75       | 56.04       | 62            | 22.702    | 0          | 100        | 50.97                | 50            | 23.267    | 5          | 100        |
| Unrestricted time                                                      | 75       | 56.36       | 56            | 25.396    | 6          | 100        | 50.39                | 51            | 28.349    | 0          | 100        |

| Egon Schiele, Stadt am blauen Fluss ( <u>Krumau</u> ), 1910 |          |             |               |           |            |            |                      |               |           |            |            |
|-------------------------------------------------------------|----------|-------------|---------------|-----------|------------|------------|----------------------|---------------|-----------|------------|------------|
|                                                             |          | Original    |               |           |            |            | Augmented saturation |               |           |            |            |
|                                                             | <i>n</i> | <i>Mean</i> | <i>Median</i> | <i>SD</i> | <i>Min</i> | <i>Max</i> | <i>Mean</i>          | <i>Median</i> | <i>SD</i> | <i>Min</i> | <i>Max</i> |
| 100ms                                                       | 75       | 49.00       | 50            | 23.684    | 1          | 100        | 50.75                | 52            | 21.467    | 3          | 100        |
| Unrestricted time                                           | 75       | 45.24       | 45            | 23.718    | 0          | 94         | 44.25                | 40            | 27.224    | 0          | 95         |

| Paula Modersohn-Becker, Stilleben mit Ringelrosen und Bernsteinkette vor Landschaft, 1907 |          |             |               |           |            |            |                      |               |           |            |            |
|-------------------------------------------------------------------------------------------|----------|-------------|---------------|-----------|------------|------------|----------------------|---------------|-----------|------------|------------|
|                                                                                           |          | Original    |               |           |            |            | Augmented saturation |               |           |            |            |
|                                                                                           | <i>n</i> | <i>Mean</i> | <i>Median</i> | <i>SD</i> | <i>Min</i> | <i>Max</i> | <i>Mean</i>          | <i>Median</i> | <i>SD</i> | <i>Min</i> | <i>Max</i> |
| 100ms                                                                                     | 75       | 43.00       | 43            | 23.417    | 0          | 97         | 43.79                | 43            | 23.446    | 0          | 90         |
| Unrestricted time                                                                         | 75       | 32.52       | 25            | 23.294    | 0          | 91         | 39.65                | 38            | 24.916    | 0          | 100        |

| Paul Cézanne, Nature morte avec pot, tasse et pommes, 1877 |          |             |               |           |            |            |                      |               |           |            |            |
|------------------------------------------------------------|----------|-------------|---------------|-----------|------------|------------|----------------------|---------------|-----------|------------|------------|
|                                                            |          | Original    |               |           |            |            | Augmented saturation |               |           |            |            |
|                                                            | <i>n</i> | <i>Mean</i> | <i>Median</i> | <i>SD</i> | <i>Min</i> | <i>Max</i> | <i>Mean</i>          | <i>Median</i> | <i>SD</i> | <i>Min</i> | <i>Max</i> |
| 100ms                                                      | 75       | 43.97       | 41            | 23.974    | 4          | 100        | 45.79                | 46            | 23.780    | 5          | 90         |
| Unrestricted time                                          | 75       | 38.25       | 37            | 24.113    | 0          | 100        | 36.61                | 33            | 21.558    | 0          | 88         |
